# Supplementary material
Source: publisher figshare collection journal article supplement (https://sage.figshare.com/ndownloader/files/17922443)
Supplement: Supplementary file 1 [file 17922443]

System	Lead vehicle braking [m/s2]	Event number	BRT mean [s]	BRT sd [s]	Number of drivers who braked	Number of drivers who did not brake
ACC	-4.5	1	3.75	0.688	8	17
ACC	-4.5	2	3.97	1.654	5	19
ACC	-4.5	4	3.793	1.489	7	18
ACC	-4.5	5	4.105	1.131	6	18
ACC	-4	3	3.955	0.744	17	0
ACC	-4	6	3.503	0.51	17	0
ACC	-3.5	3	4.288	0.465	16	0
ACC	-3.5	6	4.009	0.714	16	0
ACC	-3	3	4.507	0.675	16	0
ACC	-3	6	4.339	0.631	16	0
ACC	-2.5	1	5.745	1.716	4	20
ACC	-2.5	2	7.33	1.697	2	23
ACC	-2.5	4	3.78	NA	1	23
ACC	-2.5	5	5.105	3.019	2	23
CC	-4.5	1	2.59	0.472	25	0
CC	-4.5	2	2.336	0.332	24	0
CC	-4.5	4	2.266	0.356	25	0
CC	-4.5	5	2.305	0.397	24	0
CC	-4	3	2.515	0.235	17	0
CC	-4	6	2.496	0.287	17	0
CC	-3.5	3	2.705	0.527	16	0
CC	-3.5	6	2.705	0.473	16	0
CC	-3	3	2.816	0.306	16	0
CC	-3	6	2.868	0.47	16	0
CC	-2.5	1	3.473	0.457	24	0
CC	-2.5	2	3.336	0.668	25	0
CC	-2.5	4	3.15	0.339	24	0
CC	-2.5	5	3.231	0.594	25	0
